# Supplementary material for: Persistent Tic Disorders Are Associated With 17q12 Duplications
Source: Research Square preprint supplement (doi:10.21203/rs.3.rs-7031850/v1), 2025-08-19
Supplement: Supplementary file 1 [file 0970446b384cec909a6b0e59.xlsx]

## Sheet: Table of contents
TABLE OF CONTENTS
Table S1. Number of probes per dataset at each step by array group.
Table S2. Number of samples per dataset after each QC step.
Table S3. Deletion call rate per dataset after each CNV filter step.
Table S4. Duplication call rate per dataset after each CNV filter step.
Table S5. Array group case/control call rates after each CNV filter step.
Table S6. Control/control CNV burden tests for adjusting the minimum CNV size and probe count
Table S7. Case/control groups defined for global CNV burden and association tests.
Table S8. Full results of global CNV burden analyses.
Table S9. Leave-one-out analyses of global CNV burden.
Table S10. Number of probes per array group mapping to each protein-coding gene.
Table S11. Summary statistics from gene-based association tests.
Table S12. Summary statistics from locus-based association tests.

## Sheet: Table S1
Table S1. Number of probes per dataset at each step by array group.
array_group	dataset_name	n_probes_raw	n_probes_missingness_sex_qc	n_probes_hg18tohg19	n_probes_merged_arraygroup	n_probes_merged_all	n_probes_merged_all_1kg
610K	ALZ_610K_ctrls	588426	583983		581121	61253	58576
610K	TS_GWAS1_610K	592532	586469	586119	581121	61253	58576
GSA	TS_GSA_for_CNV	700078	652035		637850	61253	58576
GSA	GSA_UFpharma_controls	700078	648391		637850	61253	58576
GSA	gpc_pato_gsa_md_v2	688032	668915		637850	61253	58576
OmniExp	2012-328s_OmniExpressExome_batch1	958178	914127		496145	61253	58576
OmniExp	2012-328s_OmniExpressExome_batch2	958178	914410		496145	61253	58576
OmniExp	2012-328s_OmniExpressExome_batch3	958178	743233		496145	61253	58576
OmniExp	2014-033s_OmniExpressExome	958178	738043		496145	61253	58576
OmniExp	Pato_GPC_OmniExp_controls	730525	711412		496145	61253	58576
OmniExp	TICgenetics_OmniExpressExome	964193	918299		496145	61253	58576
OmniExp	emtics_part1_181PNs_HumanOmniExpress-24v1	713014	701920		496145	61253	58576
OmniExp	emtics_part1_331PNs_OmniExpress-24v1-2	713599	700103		496145	61253	58576
OmniExp	emtics_part2_1164PNs_HumanOmniExpress-24v1-1	713014	704432		496145	61253	58576
OmniExp	emtics_part2_727PNs_OmniEpress-24v1-2	713599	699074		496145	61253	58576
OmniExp	WTCCC2_EGAD22_Duo1M	1124620	1110784	1109904	496145	61253	58576
OmniExp	WTCCC2_EGAD24_Duo1M	1124620	1111034	1110148	496145	61253	58576

## Sheet: Table S2
Table S2. Number of samples per dataset after each QC step.
group	dataset	raw	pre_clustering_qc	study_inclusion	missingness	sex_concordance	relatedness	heterozygosity	intensity_qc	cnv_qc
610K	ALZ_610K_ctrls	3008	2325	622	622	622	622	617	589	581
610K	TS_GWAS1_610K	2231	2022	1244	1241	1241	1103	1096	1030	1020
GSA	gpc_pato_gsa_md_v2	5689	5689	1951	1950	1831	1800	1756	1682	1659
GSA	GSA_UFpharma_controls	878	844	844	844	826	823	810	761	670
GSA	TS_GSA_for_CNV	400	388	382	382	334	323	313	296	287
OmniExp	2012-328s_OmniExpressExome_batch1	1152	1133	1118	1118	1109	1092	1083	1036	1016
OmniExp	2012-328s_OmniExpressExome_batch2	2156	2116	2101	2101	2082	2055	2037	1957	1920
OmniExp	2012-328s_OmniExpressExome_batch3	136	135	134	134	134	133	133	126	122
OmniExp	2014-033s_OmniExpressExome	473	464	418	418	415	84	83	78	76
OmniExp	emtics_part1_181PNs_HumanOmniExpress-24v1	182	176	176	176	174	166	165	156	151
OmniExp	emtics_part1_331PNs_OmniExpress-24v1-2	332	328	328	328	328	327	326	307	303
OmniExp	emtics_part2_1164PNs_HumanOmniExpress-24v1-1	1164	1152	1152	1152	1141	1064	1048	1016	1015
OmniExp	emtics_part2_727PNs_OmniEpress-24v1-2	723	705	711	698	698	639	633	618	606
OmniExp	Pato_GPC_OmniExp_controls	1494	1468	1434	1434	1417	1361	1349	1295	1273
OmniExp	TICgenetics_OmniExpressExome	1249	1192	384	384	384	379	374	355	354
OmniExp	WTCCC2_EGAD22_Duo1M	2921	2586	2586	2581	2573	2559	2548	2435	2295
OmniExp	WTCCC2_EGAD24_Duo1M	2700	2342	2341	2341	2313	2278	2262	2154	2122
TOTALS	TOTALS	26888	25065	17926	17904	17622	16808	16633	15891	15470

## Sheet: Table S3
Table S3. Deletion call rate per dataset after each CNV filter step.
filter_step	2012-328s	2014-033s_OmniExpressExome	ALZ_610K_ctrls	emtics	gpc_pato_gsa_md_v2	GSA_UFpharma_controls	Pato_GPC_OmniExp_controls	TICgenetics_OmniExpressExome	TS_GSA_for_CNV	TS_GWAS1_610K	WTCCC2
qual_cnv	0.327338	0.276316	0.589655	0.293976	0.526823	0.629851	0.354281	0.350282	0.623693	0.539216	0.330541
centromere_telomere	0.322433	0.276316	0.551724	0.291566	0.496685	0.589552	0.347997	0.347458	0.578397	0.526471	0.327598
human_g1k_v37-N	0.322433	0.276316	0.551724	0.291566	0.495479	0.586567	0.347997	0.347458	0.578397	0.526471	0.327598
segmental_dup	0.282865	0.223684	0.410345	0.262169	0.367089	0.385075	0.302435	0.316384	0.365854	0.419608	0.282545
simplerepeat_lowcomplexity_satellite	0.282865	0.223684	0.403448	0.262169	0.353225	0.352239	0.302435	0.316384	0.358885	0.408824	0.282545
Immunoglobulins_TcellReceptors	0.282865	0.223684	0.403448	0.262169	0.353225	0.352239	0.302435	0.316384	0.358885	0.408824	0.282545
LCL_loci	0.282865	0.223684	0.331034	0.262169	0.349608	0.350746	0.302435	0.316384	0.358885	0.405882	0.282545
het_filter	0.281557	0.223684	0.318966	0.258795	0.339361	0.343284	0.30165	0.313559	0.344948	0.398039	0.279602
frq_gnomAD	0.240026	0.197368	0.27931	0.219759	0.323689	0.314925	0.250589	0.265537	0.30662	0.351961	0.234096
frq_eachdataset	0.199804	0.197368	0.246552	0.196145	0.253165	0.28806	0.216811	0.257062	0.285714	0.303922	0.193118

## Sheet: Table S4
Table S4. Duplication call rate per dataset after each CNV filter step.
filter_step	2012-328s	2014-033s_OmniExpressExome	ALZ_610K_ctrls	emtics	gpc_pato_gsa_md_v2	GSA_UFpharma_controls	Pato_GPC_OmniExp_controls	TICgenetics_OmniExpressExome	TS_GSA_for_CNV	TS_GWAS1_610K	WTCCC2
qual_cnv	0.641923	0.763158	0.798276	0.604819	1.16576	1.12687	0.717203	0.59887	1.14634	0.851961	0.661082
centromere_telomere	0.592217	0.644737	0.713793	0.554217	1.04822	0.968657	0.665357	0.545198	1.02787	0.782353	0.609463
human_g1k_v37-N	0.592217	0.644737	0.713793	0.553253	1.04581	0.961194	0.662215	0.542373	1.01742	0.782353	0.607879
segmental_dup	0.403205	0.513158	0.467241	0.365783	0.490054	0.534328	0.443048	0.361582	0.602787	0.521569	0.402309
simplerepeat_lowcomplexity_satellite	0.396664	0.5	0.463793	0.35759	0.456902	0.491045	0.428908	0.358757	0.571429	0.472549	0.39914
Immunoglobulins_TcellReceptors	0.396664	0.5	0.463793	0.35759	0.456902	0.491045	0.428908	0.358757	0.571429	0.472549	0.39914
LCL_loci	0.396664	0.5	0.463793	0.35759	0.456902	0.489552	0.428908	0.358757	0.571429	0.472549	0.39914
het_filter	0.389143	0.5	0.451724	0.352289	0.40868	0.41194	0.410841	0.355932	0.466899	0.447059	0.390537
frq_gnomAD	0.365271	0.473684	0.415517	0.337831	0.386377	0.386567	0.383346	0.336158	0.439024	0.423529	0.358388
frq_eachdataset	0.30412	0.460526	0.353448	0.293012	0.331525	0.361194	0.288295	0.288136	0.418118	0.348039	0.279602

## Sheet: Table S5
Table S5. Array group case/control call rates after each CNV filter step.
arraygroup	filter_step	n_del	n_del_per_sample	nbp_del_per_sample	n_del_aov_p	nbp_del_aov_p	n_dup	n_dup_per_sample	nbp_dup_per_sample	n_dup_aov_p	nbp_dup_aov_p	n_cnv	n_cnv_per_sample	nbp_cnv_per_sample	n_cnv_aov_p	nbp_cnv_aov_p
OmniExp	qual_cnv	3667	0.325869	84811.5	0.0127931	0.0838627	7321	0.650582	196939	0.0138766	0.000982784	10988	0.976451	281751	0.00014263	9.50625e-05
OmniExp	centromere_telomere	3625	0.322136	84041.5	0.0177299	0.0978181	6742	0.599129	185760	0.0351573	0.00160463	10367	0.921265	269802	0.000828945	0.000179072
OmniExp	human_g1k_v37-N	3625	0.322136	84041.5	0.0177299	0.0978181	6728	0.597885	179991	0.0454967	0.00686172	10353	0.920021	264032	0.00112592	0.000803167
OmniExp	segmental_dup	3171	0.281792	73809.2	0.0414882	0.200322	4500	0.399893	146986	0.0491551	0.0128254	7671	0.681685	220795	0.00291697	0.00348143
OmniExp	simplerepeat_lowcomplexity_satellite	3171	0.281792	73809.2	0.0414882	0.200322	4429	0.393584	142962	0.0997441	0.0293957	7600	0.675375	216771	0.00637305	0.00886074
OmniExp	Immunoglobulins_TcellReceptors	3171	0.281792	73809.2	0.0414882	0.200322	4429	0.393584	142962	0.0997441	0.0293957	7600	0.675375	216771	0.00637305	0.00886074
OmniExp	LCL_loci	3171	0.281792	73809.2	0.0414882	0.200322	4429	0.393584	142962	0.0997441	0.0293957	7600	0.675375	216771	0.00637305	0.00886074
OmniExp	het_filter	3145	0.279481	73183.9	0.0301076	0.184975	4333	0.385053	140832	0.224098	0.0464962	7478	0.664534	214016	0.0134197	0.0134908
OmniExp	frq_gnomAD	2652	0.23567	65845.6	0.101785	0.303338	4044	0.359371	134623	0.319447	0.0634812	6696	0.595041	200469	0.121079	0.03286
OmniExp	frq_eachdataset	2253	0.200213	58660.6	0.164702	0.519933	3277	0.291211	120685	0.58117	0.1354	5530	0.491425	179346	0.642442	0.124605
610K	qual_cnv	892	0.5575	146776	0.921149	0.158662	1332	0.8325	239229	0.415325	0.652789	2224	1.39	386006	0.494038	0.718194
610K	centromere_telomere	857	0.535625	141308	0.637914	0.205379	1212	0.7575	224056	0.46415	0.763206	2069	1.29313	365365	0.399216	0.686537
610K	human_g1k_v37-N	857	0.535625	141308	0.637914	0.205379	1212	0.7575	224056	0.46415	0.763206	2069	1.29313	365365	0.399216	0.686537
610K	segmental_dup	666	0.41625	113202	0.375295	0.339376	803	0.501875	173603	0.407278	0.786017	1469	0.918125	286804	0.234476	0.799071
610K	simplerepeat_lowcomplexity_satellite	651	0.406875	109408	0.352498	0.396216	751	0.469375	161449	0.942735	0.898857	1402	0.87625	270857	0.501454	0.591162
610K	Immunoglobulins_TcellReceptors	651	0.406875	109408	0.352498	0.396216	751	0.469375	161449	0.942735	0.898857	1402	0.87625	270857	0.501454	0.591162
610K	LCL_loci	606	0.37875	97736.6	0.0167043	0.414231	751	0.469375	161449	0.942735	0.898857	1357	0.848125	259186	0.111509	0.7885
610K	het_filter	591	0.369375	95314.6	0.0171151	0.344777	718	0.44875	156718	0.911093	0.93327	1309	0.818125	252033	0.102877	0.717013
610K	frq_gnomAD	521	0.325625	87928.4	0.0115188	0.336299	673	0.420625	150397	0.883712	0.981486	1194	0.74625	238326	0.0872839	0.675096
610K	frq_eachdataset	453	0.283125	81483.7	0.0318221	0.46943	560	0.35	138118	0.86602	0.970794	1013	0.633125	219602	0.213966	0.765234
GSA	qual_cnv	1475	0.563838	138549	0.00237506	0.335334	3018	1.15367	413035	0.505448	0.0145298	4493	1.71751	551584	0.336692	0.049796
GSA	centromere_telomere	1385	0.529434	133140	0.00467637	0.350239	2683	1.02561	387754	0.144802	0.00687551	4068	1.55505	520895	0.832203	0.0272409
GSA	human_g1k_v37-N	1381	0.527905	127779	0.0054192	0.543573	2671	1.02102	371274	0.118108	0.000508464	4052	1.54893	499053	0.917312	0.00206225
GSA	segmental_dup	972	0.37156	86756.4	0.514208	0.251914	1344	0.513761	157673	0.191154	0.422389	2316	0.885321	244430	0.151248	0.955076
GSA	simplerepeat_lowcomplexity_satellite	925	0.353593	81194.9	0.969854	0.193649	1251	0.478211	147732	0.291936	0.879601	2176	0.831804	228927	0.422329	0.568723
GSA	Immunoglobulins_TcellReceptors	925	0.353593	81194.9	0.969854	0.193649	1251	0.478211	147732	0.291936	0.879601	2176	0.831804	228927	0.422329	0.568723
GSA	LCL_loci	918	0.350917	80782.3	0.965021	0.208558	1250	0.477829	147669	0.313534	0.893333	2168	0.828746	228452	0.412443	0.575014
GSA	het_filter	892	0.340979	78893.7	0.877831	0.217557	1088	0.415902	136159	0.913797	0.856898	1980	0.756881	215053	0.855462	0.413311
GSA	frq_gnomAD	836	0.319572	75432.3	0.72551	0.149713	1026	0.392202	131828	0.994855	0.799518	1862	0.711774	207261	0.824091	0.321123
GSA	frq_eachdataset	695	0.265673	66757.4	0.123322	0.480772	912	0.348624	123716	0.277987	0.802364	1607	0.614297	190473	0.0680753	0.868381

## Sheet: Table S6
Table S6. Control/control CNV burden tests for adjusting the minimum CNV size and probe count
group	numsnp_min	size_min	size_max	pvalue_min
OmniExp	10	30001	20000000	0.00207234
OmniExp	10	100001	20000000	0.21001
OmniExp	15	30001	20000000	0.0311615
OmniExp	15	100001	20000000	0.143065
GSA	10	30001	20000000	0.0460502
GSA	10	100001	20000000	0.0556381
GSA	15	30001	20000000	0.130053
GSA	15	100001	20000000	0.102383
610K	10	30001	20000000	0.0024125
610K	10	100001	20000000	0.0286767
610K	15	30001	20000000	0.112291
610K	15	100001	20000000	0.121616

## Sheet: Table S7
Table S6. Case/control groups defined for global CNV burden and association tests.
name	arraygroup	cluster	sex	in_global_burden_tests	in_assoc_tests	n_samples	percent_cases	n_cases	n_controls
610K_1_FEMALE	610K	1	FEMALE	Yes	Yes	380	0.797	303	77
610K_1_MALE	610K	1	MALE	Yes	Yes	451	0.459	207	244
610K_2_FEMALE	610K	2	FEMALE	Yes	Yes	24	0.625	15	9
610K_2_MALE	610K	2	MALE	Yes	Yes	49	0.49	24	25
610K_3_FEMALE	610K	3	FEMALE	Yes	Yes	160	0.688	110	50
610K_3_MALE	610K	3	MALE	Yes	Yes	328	0.299	98	230
610K_5_FEMALE	610K	5	FEMALE	Yes	Yes	59	0.288	17	42
GSA_1_FEMALE	GSA	1	FEMALE	Yes	Yes	236	0.881	208	28
GSA_1_MALE	GSA	1	MALE	Yes	Yes	362	0.818	296	66
GSA_2_FEMALE	GSA	2	FEMALE	Yes	Yes	32	0.781	25	7
GSA_2_MALE	GSA	2	MALE	Yes	Yes	39	0.769	30	9
GSA_3_FEMALE	GSA	3	FEMALE	Yes	Yes	75	0.827	62	13
GSA_3_MALE	GSA	3	MALE	Yes	Yes	97	0.773	75	22
GSA_5_MALE	GSA	5	MALE	Yes	Yes	49	0.51	25	24
GSA_6_MALE	GSA	6	MALE	Yes	Yes	174	0.736	128	46
GSA_7_MALE	GSA	7	MALE	Yes	Yes	47	0.66	31	16
GSA_8_FEMALE	GSA	8	FEMALE	Yes	Yes	38	0.789	30	8
GSA_8_MALE	GSA	8	MALE	Yes	Yes	47	0.66	31	16
OmniExp_1_FEMALE	OmniExp	1	FEMALE	Yes	Yes	2914	0.848	2470	444
OmniExp_1_MALE	OmniExp	1	MALE	Yes	Yes	3751	0.664	2489	1262
OmniExp_2_FEMALE	OmniExp	2	FEMALE	Yes	Yes	810	0.722	585	225
OmniExp_2_MALE	OmniExp	2	MALE	Yes	Yes	1399	0.48	672	727
OmniExp_3_FEMALE	OmniExp	3	FEMALE	Yes	Yes	460	0.498	229	231
OmniExp_3_MALE	OmniExp	3	MALE	Yes	Yes	977	0.203	198	779
OmniExp_4_MALE	OmniExp	4	MALE	Yes	Yes	11	0.455	5	6
OmniExp_5_FEMALE	OmniExp	5	FEMALE	Yes	Yes	286	0.531	152	134
OmniExp_5_MALE	OmniExp	5	MALE	Yes	Yes	435	0.172	75	360
OmniExp_6_FEMALE	OmniExp	6	FEMALE	Yes	Yes	39	0.59	23	16
OmniExp_6_MALE	OmniExp	6	MALE	Yes	Yes	69	0.362	25	44
OmniExp_7_FEMALE	OmniExp	7	FEMALE	Yes	Yes	28	0.643	18	10
OmniExp_7_MALE	OmniExp	7	MALE	Yes	Yes	43	0.256	11	32
BioVU	MEGA-EX	EUR	MALE	No	Yes
BioVU	MEGA-EX	EUR	FEMALE	No	Yes
EGOS	GSA	EUR	FEMALE	No	Yes	511	0.129	66	445
EGOS	GSA	EUR	MALE	No	Yes	786	0.137	108	678
NORDiCSWE	GSA	EUR	FEMALE	No	Yes	291	0.261	76	215
NORDiCSWE	GSA	EUR	MALE	No	Yes	311	0.36	112	199

## Sheet: Table S8
Table S8. Full results of global CNV burden analyses.
predictor	group	control_rate	n_cases	n_controls	n_samples	n_samples_eff	lm_est	lm_est_95ci_l	lm_est_95ci_u	lm_p	lg_est	lg_est_95ci_l	lg_est_95ci_u	lg_p
n_cnv	ALL	0.520018	5201	8667	13868	13001.7	0.0200829	-0.0103335	0.0504994	0.195614	1.03421	0.979922	1.09138	0.220852
n_del	ALL	0.216107	5201	8667	13868	13001.7	0.00347716	-0.015578	0.0225323	0.720586	1.02068	0.936257	1.11221	0.641263
n_dup	ALL	0.303911	5201	8667	13868	13001.7	0.0166058	-0.00696989	0.0401814	0.167411	1.04343	0.973418	1.11824	0.229449
n100kb_cnv	ALL	1.77051	5201	8667	13868	13001.7	0.261798	0.0693138	0.454282	0.00768528	1.0125	1.00329	1.02196	0.00830402
n100kb_del	ALL	0.58312	5201	8667	13868	13001.7	0.0881753	-0.017726	0.194077	0.102693	1.01343	0.997433	1.03043	0.109039
n100kb_dup	ALL	1.18739	5201	8667	13868	13001.7	0.173623	0.0201175	0.327128	0.026638	1.01227	1.0011	1.02368	0.0319637
n_del_100kb_to_200kb	ALL	0.12761	5201	8667	13868	13001.7	-0.00174979	-0.0161645	0.012665	0.811933	0.994156	0.88568	1.11487	0.920463
n_del_200kb_to_500kb	ALL	0.0704973	5201	8667	13868	13001.7	0.00285988	-0.00823701	0.0139568	0.613451	1.03762	0.896358	1.20002	0.619629
n_del_500kb_to_1mb	ALL	0.0108457	5201	8667	13868	13001.7	0.000621907	-0.00363119	0.004875	0.774408	1.03718	0.705729	1.51281	0.850884
n_del_gt_1mb	ALL	0.00715357	5201	8667	13868	13001.7	0.00174516	-0.00191517	0.00540549	0.350037	1.24915	0.813659	1.91091	0.305903
n_dup_100kb_to_200kb	ALL	0.123111	5201	8667	13868	13001.7	0.0120681	-0.0030483	0.0271845	0.117638	1.09101	0.979538	1.21466	0.112417
n_dup_200kb_to_500kb	ALL	0.118034	5201	8667	13868	13001.7	-0.00169794	-0.0161676	0.0127717	0.818086	0.966981	0.862133	1.08369	0.564876
n_dup_500kb_to_1mb	ALL	0.0419984	5201	8667	13868	13001.7	0.000254169	-0.0080314	0.00853974	0.952054	1.00321	0.819516	1.22588	0.975114
n_dup_gt_1mb	ALL	0.0207684	5201	8667	13868	13001.7	0.00598146	1.49259e-05	0.011948	0.0494297	1.33796	1.01637	1.75606	0.036758
n_cnv_100kb_to_200kb	ALL	0.250721	5201	8667	13868	13001.7	0.0103183	-0.0105802	0.0312168	0.333169	1.04439	0.965511	1.12935	0.277325
n_cnv_200kb_to_500kb	ALL	0.188531	5201	8667	13868	13001.7	0.00116194	-0.0171087	0.0194326	0.900797	0.993187	0.907486	1.08651	0.881664
n_cnv_500kb_to_1mb	ALL	0.0528441	5201	8667	13868	13001.7	0.000876075	-0.00844305	0.0101952	0.853805	1.01052	0.845148	1.20654	0.908221
n_cnv_gt_1mb	ALL	0.027922	5201	8667	13868	13001.7	0.00772662	0.000683176	0.0147701	0.0315521	1.30802	1.0392	1.64378	0.0216379
n_del_freq1to1	ALL	0.0843429	5201	8667	13868	13001.7	0.000453067	-0.0113495	0.0122557	0.940022	1.01806	0.885757	1.16884	0.800205
n_del_freq2to5	ALL	0.0723434	5201	8667	13868	13001.7	-0.00515498	-0.0158645	0.00555451	0.345439	0.92986	0.795359	1.08528	0.358894
n_del_freq6to10	ALL	0.0239991	5201	8667	13868	13001.7	0.00215215	-0.00416189	0.00846619	0.504072	1.08207	0.835226	1.39766	0.547876
n_del_freq11to30	ALL	0.0276912	5201	8667	13868	13001.7	0.00695779	-0.000249889	0.0141655	0.0584881	1.22763	0.981993	1.53363	0.0711906
n_del_freq31to89	ALL	0.00773047	5201	8667	13868	13001.7	-0.000930862	-0.004475	0.00261327	0.606682	0.917831	0.582813	1.42984	0.707443
n_dup_freq1to1	ALL	0.106034	5201	8667	13868	13001.7	0.0102799	-0.00323184	0.0237917	0.135906	1.07738	0.953163	1.21709	0.23183
n_dup_freq2to5	ALL	0.10165	5201	8667	13868	13001.7	-0.000325372	-0.0134422	0.0127915	0.961221	1.00051	0.882262	1.13374	0.993596
n_dup_freq6to10	ALL	0.0398062	5201	8667	13868	13001.7	0.00530784	-0.002945	0.0135607	0.20745	1.13049	0.927442	1.37577	0.222507
n_dup_freq11to30	ALL	0.0366909	5201	8667	13868	13001.7	-8.03195e-06	-0.00789156	0.00787549	0.998407	0.988066	0.802484	1.21381	0.909405
n_dup_freq31to89	ALL	0.01973	5201	8667	13868	13001.7	0.00135141	-0.00447128	0.0071741	0.649164	1.07709	0.815199	1.41967	0.599498
n_cnv_freq1to1	ALL	0.190377	5201	8667	13868	13001.7	0.010733	-0.00728285	0.0287488	0.242925	1.05058	0.958722	1.15082	0.2895
n_cnv_freq2to5	ALL	0.173993	5201	8667	13868	13001.7	-0.00548035	-0.0224194	0.0114587	0.52598	0.971942	0.881447	1.07119	0.567106
n_cnv_freq6to10	ALL	0.0638052	5201	8667	13868	13001.7	0.00745999	-0.00291606	0.017836	0.15878	1.11237	0.950692	1.30034	0.182436
n_cnv_freq11to30	ALL	0.0643821	5201	8667	13868	13001.7	0.00694976	-0.00375462	0.0176541	0.203179	1.0915	0.938206	1.26901	0.255674
n_cnv_freq31to89	ALL	0.0274605	5201	8667	13868	13001.7	0.000420545	-0.00636242	0.00720351	0.903274	1.03031	0.812337	1.30423	0.80463
n_del_nongenic	ALL	0.132226	5201	8667	13868	13001.7	-0.00661745	-0.021558	0.00832307	0.385309	0.962957	0.862197	1.07458	0.50152
n_del_genic	ALL	0.0838814	5201	8667	13868	13001.7	0.0100946	-0.00178879	0.021978	0.0959197	1.11849	0.974458	1.28267	0.110121
n_dup_nongenic	ALL	0.0844583	5201	8667	13868	13001.7	-0.00287139	-0.014894	0.00915118	0.639688	0.951122	0.828768	1.09002	0.473297
n_dup_genic	ALL	0.219453	5201	8667	13868	13001.7	0.0194772	-0.000567787	0.0395221	0.0568511	1.08028	0.995355	1.17218	0.0640932
n_cnv_nongenic	ALL	0.216684	5201	8667	13868	13001.7	-0.00948884	-0.0287129	0.00973522	0.333308	0.958677	0.879973	1.04388	0.332715
n_cnv_genic	ALL	0.303334	5201	8667	13868	13001.7	0.0295718	0.00629182	0.0528517	0.0127897	1.09046	1.01624	1.16992	0.0159131
ngenes_del	ALL	0.243914	5201	8667	13868	13001.7	0.0379308	-0.0311585	0.10702	0.281885	1.0111	0.988289	1.03517	0.34699
ngenes_dup	ALL	0.775701	5201	8667	13868	13001.7	0.181227	0.0442648	0.318188	0.00950678	1.01706	1.00439	1.02897	0.00562801
ngenes_cnv	ALL	1.01961	5201	8667	13868	13001.7	0.219157	0.0653423	0.372973	0.00523221	1.01582	1.00459	1.0266	0.00440945
n_del_pli_0_to_50	ALL	0.0642668	5201	8667	13868	13001.7	-0.00256347	-0.0126829	0.00755598	0.619519	0.957564	0.813184	1.12586	0.601238
n_del_pli_50_to_1	ALL	0.0196146	5201	8667	13868	13001.7	0.0126581	0.00648114	0.018835	5.93061e-05	1.68437	1.29659	2.1878	9.24638e-05
n_del_pli_50_to_995	ALL	0.0101535	5201	8667	13868	13001.7	0.00649803	0.00204807	0.010948	0.00421242	1.65699	1.15312	2.38406	0.00634836
n_del_pli_995_to_1	ALL	0.00946117	5201	8667	13868	13001.7	0.00616006	0.00193141	0.0103887	0.00430445	1.72933	1.18057	2.52858	0.00475704
n_del_pli_50_to_1_noNRXN1	ALL	0.0193839	5201	8667	13868	13001.7	0.00880958	0.00280619	0.014813	0.00402892	1.46804	1.11947	1.92297	0.00536908
n_del_pli_995_to_1_noNRXN1	ALL	0.00923041	5201	8667	13868	13001.7	0.00231155	-0.00165154	0.00627463	0.252939	1.26552	0.832738	1.90898	0.264941
n_del_pHaplo_ge86	ALL	0.0178839	5201	8667	13868	13001.7	0.00811527	0.00235867	0.0138719	0.00573018	1.45744	1.10233	1.92495	0.00802626
n_del_pHaplo_lt86	ALL	0.0659975	5201	8667	13868	13001.7	0.00197935	-0.00840375	0.0123624	0.70866	1.02781	0.87679	1.20332	0.734049
n_del_pTriplo_ge94	ALL	0.00634591	5201	8667	13868	13001.7	0.00067928	-0.00259884	0.0039574	0.684623	1.05009	0.626375	1.73687	0.850359
n_del_pTriplo_lt94	ALL	0.0775355	5201	8667	13868	13001.7	0.00941534	-0.00199766	0.0208283	0.105891	1.12438	0.974209	1.29645	0.107722
n_dup_pli_0_to_50	ALL	0.123226	5201	8667	13868	13001.7	0.0195585	0.004436	0.0346809	0.0112518	1.1438	1.02669	1.27393	0.0146173
n_dup_pli_50_to_1	ALL	0.0962271	5201	8667	13868	13001.7	-8.1289e-05	-0.0129718	0.0128092	0.990138	1.00043	0.880309	1.1361	0.994735
n_dup_pli_50_to_995	ALL	0.0471905	5201	8667	13868	13001.7	0.00115733	-0.00792629	0.010241	0.802793	1.02609	0.856469	1.22781	0.779147
n_dup_pli_995_to_1	ALL	0.0490366	5201	8667	13868	13001.7	-0.00123862	-0.0102025	0.00772525	0.78651	0.9741	0.808458	1.17105	0.781209
n_dup_pli_50_to_1_noNRXN1	ALL	0.0962271	5201	8667	13868	13001.7	-0.000309771	-0.0131875	0.012568	0.962394	0.997996	0.877985	1.13357	0.975446
n_dup_pli_995_to_1_noNRXN1	ALL	0.0490366	5201	8667	13868	13001.7	-0.00146711	-0.0104119	0.00747772	0.74784	0.968928	0.803613	1.16561	0.739233
n_dup_pHaplo_ge86	ALL	0.086189	5201	8667	13868	13001.7	0.003911	-0.00824785	0.0160698	0.528381	1.03783	0.905928	1.18774	0.590876
n_dup_pHaplo_lt86	ALL	0.133264	5201	8667	13868	13001.7	0.0155662	-7.16537e-05	0.031204	0.0510589	1.10964	0.999387	1.23172	0.0509916
n_dup_pTriplo_ge94	ALL	0.0251529	5201	8667	13868	13001.7	0.00229006	-0.00411105	0.00869116	0.483154	1.07542	0.827841	1.39355	0.58393
n_dup_pTriplo_lt94	ALL	0.1943	5201	8667	13868	13001.7	0.0171871	-0.00169611	0.0360703	0.0744335	1.08169	0.991852	1.17939	0.0754414
n_cnv_pli_0_to_50	ALL	0.187493	5201	8667	13868	13001.7	0.016995	-0.00114813	0.0351381	0.0663651	1.08384	0.990131	1.18599	0.0803061
n_cnv_pli_50_to_1	ALL	0.115842	5201	8667	13868	13001.7	0.0125768	-0.00176156	0.0269152	0.0855785	1.10324	0.9844	1.23601	0.0905614
n_cnv_pli_50_to_995	ALL	0.0573439	5201	8667	13868	13001.7	0.00765536	-0.00252581	0.0178365	0.140544	1.12491	0.958958	1.31896	0.147622
n_cnv_pli_995_to_1	ALL	0.0584978	5201	8667	13868	13001.7	0.00492144	-0.00497983	0.0148227	0.329931	1.08531	0.918228	1.28095	0.334896
n_cnv_pli_50_to_1_noNRXN1	ALL	0.115611	5201	8667	13868	13001.7	0.00849981	-0.00575213	0.0227517	0.242416	1.06893	0.9529	1.19862	0.254631
n_cnv_pli_995_to_1_noNRXN1	ALL	0.058267	5201	8667	13868	13001.7	0.000844441	-0.00892735	0.0106162	0.865494	1.01261	0.85358	1.19924	0.885095
n_cnv_pHaplo_ge86	ALL	0.104073	5201	8667	13868	13001.7	0.0120263	-0.00145242	0.025505	0.0803275	1.10595	0.9794	1.24803	0.10332
n_cnv_pHaplo_lt86	ALL	0.199262	5201	8667	13868	13001.7	0.0175455	-0.00122044	0.0363115	0.0668748	1.08467	0.993696	1.18362	0.0684882
n_cnv_pTriplo_ge94	ALL	0.0314988	5201	8667	13868	13001.7	0.00296934	-0.00425115	0.0101898	0.42021	1.06984	0.848018	1.34681	0.567055
n_cnv_pTriplo_lt94	ALL	0.271836	5201	8667	13868	13001.7	0.0266024	0.0045408	0.0486641	0.0181132	1.09321	1.01498	1.17727	0.0185013
n_del_NDDgene	ALL	0.00392293	5201	8667	13868	13001.7	0.00372581	0.000888727	0.00656289	0.0100588	2.0813	1.20062	3.61889	0.00891218
n_del_NDDgene_noNRXN1	ALL	0.00369217	5201	8667	13868	13001.7	-0.000122703	-0.00254055	0.00229515	0.920763	1.01266	0.501527	1.96351	0.970994
n_del_neurodev	ALL	0.00426907	5201	8667	13868	13001.7	0.000746051	-0.00199002	0.00348212	0.593022	1.21604	0.67055	2.16638	0.511481
n_del_neurodev_noNRXN1	ALL	0.00426907	5201	8667	13868	13001.7	0.000746051	-0.00199002	0.00348212	0.593022	1.21604	0.67055	2.16638	0.511481
n_dup_NDDgene	ALL	0.0166147	5201	8667	13868	13001.7	0.00286619	-0.00240701	0.0081394	0.286708	1.20166	0.883275	1.62916	0.239062
n_dup_NDDgene_noNRXN1	ALL	0.0166147	5201	8667	13868	13001.7	0.00263771	-0.00262482	0.00790024	0.325886	1.18614	0.870841	1.60982	0.275692
n_dup_neurodev	ALL	0.00807661	5201	8667	13868	13001.7	0.00378108	-0.000239101	0.00780125	0.0652692	1.51441	1.01515	2.24881	0.0404088
n_dup_neurodev_noNRXN1	ALL	0.00807661	5201	8667	13868	13001.7	0.00378108	-0.000239101	0.00780125	0.0652692	1.51441	1.01515	2.24881	0.0404088
n_cnv_NDDgene	ALL	0.0205377	5201	8667	13868	13001.7	0.006592	0.000607099	0.0125769	0.0308698	1.36909	1.04671	1.78729	0.0212696
n_cnv_NDDgene_noNRXN1	ALL	0.0203069	5201	8667	13868	13001.7	0.00251501	-0.00328095	0.00831097	0.395033	1.15443	0.871286	1.52456	0.313971
n_cnv_neurodev	ALL	0.0123457	5201	8667	13868	13001.7	0.00452713	-0.000321758	0.00937601	0.0672615	1.4149	1.01583	1.96307	0.0386567
n_cnv_neurodev_noNRXN1	ALL	0.0123457	5201	8667	13868	13001.7	0.00452713	-0.000321758	0.00937601	0.0672615	1.4149	1.01583	1.96307	0.0386567

## Sheet: Table S9
Table S9. Leave-one-out analyses of global CNV burden.
predictor	loo	lg_est	lg_p
n_del_pli_50_to_1	group_GSA	1.80221	3.40253e-05
n_del_pli_50_to_1	group_610K	1.47021	0.00956298
n_del_pli_50_to_1	group_OmniExp	1.529	0.0802953
n_del_pli_50_to_1	dataset_2012-328s	1.49837	0.0132556
n_del_pli_50_to_1	dataset_2014-033s_OmniExpressExome	1.70442	6.79195e-05
n_del_pli_50_to_1	dataset_ALZ_610K_ctrls	1.60115	0.000667513
n_del_pli_50_to_1	dataset_emtics	1.80617	7.90443e-05
n_del_pli_50_to_1	dataset_gpc_pato_gsa_md_v2	1.75896	3.76364e-05
n_del_pli_50_to_1	dataset_GSA_UFpharma_controls	1.71989	6.07922e-05
n_del_pli_50_to_1	dataset_Pato_GPC_OmniExp_controls	1.63801	0.000335116
n_del_pli_50_to_1	dataset_TICgenetics_OmniExpressExome	1.66231	0.000196395
n_del_pli_50_to_1	dataset_TS_GSA_for_CNV	1.80221	3.40254e-05
n_del_pli_50_to_1	dataset_TS_GWAS1_610K	1.47021	0.00956302
n_del_pli_50_to_1	dataset_WTCCC2	1.92137	5.03578e-05
n_del_pli_50_to_1	ancestrycluster_1	1.47667	0.0439836
n_del_pli_50_to_1	ancestrycluster_2	1.58821	0.00238487
n_del_pli_50_to_1	ancestrycluster_3	1.68823	0.00046092
n_del_pli_50_to_1	ancestrycluster_4	1.68622	9.45308e-05
n_del_pli_50_to_1	ancestrycluster_5	1.7841	2.8496e-05
n_del_pli_50_to_1	ancestrycluster_6	1.71302	6.33801e-05
n_del_pli_50_to_1	ancestrycluster_7	1.6972	7.96167e-05
n_del_pli_50_to_1	ancestrycluster_8	1.69023	9.07526e-05
n_cnv_gt_1mb	group_GSA	1.28941	0.0396273
n_cnv_gt_1mb	group_610K	1.37118	0.0143866
n_cnv_gt_1mb	group_OmniExp	1.08732	0.728697
n_cnv_gt_1mb	dataset_2012-328s	1.08987	0.574328
n_cnv_gt_1mb	dataset_2014-033s_OmniExpressExome	1.33408	0.0145888
n_cnv_gt_1mb	dataset_ALZ_610K_ctrls	1.33068	0.0205826
n_cnv_gt_1mb	dataset_emtics	1.27486	0.0669476
n_cnv_gt_1mb	dataset_gpc_pato_gsa_md_v2	1.31018	0.0250299
n_cnv_gt_1mb	dataset_GSA_UFpharma_controls	1.30504	0.024044
n_cnv_gt_1mb	dataset_Pato_GPC_OmniExp_controls	1.34174	0.0177747
n_cnv_gt_1mb	dataset_TICgenetics_OmniExpressExome	1.33841	0.0153256
n_cnv_gt_1mb	dataset_TS_GSA_for_CNV	1.28941	0.0396274
n_cnv_gt_1mb	dataset_TS_GWAS1_610K	1.37118	0.0143866
n_cnv_gt_1mb	dataset_WTCCC2	1.25522	0.0979045
n_cnv_gt_1mb	ancestrycluster_1	1.43084	0.0363354
n_cnv_gt_1mb	ancestrycluster_2	1.23759	0.115999
n_cnv_gt_1mb	ancestrycluster_3	1.3388	0.0249756
n_cnv_gt_1mb	ancestrycluster_4	1.3094	0.0220287
n_cnv_gt_1mb	ancestrycluster_5	1.28372	0.0396482
n_cnv_gt_1mb	ancestrycluster_6	1.27688	0.0398339
n_cnv_gt_1mb	ancestrycluster_7	1.30656	0.0234452
n_cnv_gt_1mb	ancestrycluster_8	1.29812	0.0277214
n_cnv_genic	group_GSA	1.09141	0.0223813
n_cnv_genic	group_610K	1.08114	0.0496293
n_cnv_genic	group_OmniExp	1.08848	0.219788
n_cnv_genic	dataset_2012-328s	1.0671	0.143245
n_cnv_genic	dataset_2014-033s_OmniExpressExome	1.09136	0.015907
n_cnv_genic	dataset_ALZ_610K_ctrls	1.0777	0.0485256
n_cnv_genic	dataset_emtics	1.11879	0.00734576
n_cnv_genic	dataset_gpc_pato_gsa_md_v2	1.09383	0.0153173
n_cnv_genic	dataset_GSA_UFpharma_controls	1.09304	0.0143191
n_cnv_genic	dataset_Pato_GPC_OmniExp_controls	1.08084	0.0381839
n_cnv_genic	dataset_TICgenetics_OmniExpressExome	1.08526	0.0266693
n_cnv_genic	dataset_TS_GSA_for_CNV	1.09141	0.0223813
n_cnv_genic	dataset_TS_GWAS1_610K	1.08114	0.0496294
n_cnv_genic	dataset_WTCCC2	1.11576	0.0074126
n_cnv_genic	ancestrycluster_1	1.09047	0.0845621
n_cnv_genic	ancestrycluster_2	1.10238	0.0209059
n_cnv_genic	ancestrycluster_3	1.07896	0.0576571
n_cnv_genic	ancestrycluster_4	1.09123	0.0156937
n_cnv_genic	ancestrycluster_5	1.09255	0.0166121
n_cnv_genic	ancestrycluster_6	1.08298	0.0296864
n_cnv_genic	ancestrycluster_7	1.08962	0.018105
n_cnv_genic	ancestrycluster_8	1.09623	0.0114299

[truncated: 3 more sheets: Table S10, Table S11, Table S12]
